# Supplementary material
Source: PubMed Central journal article supplement (PMC9463077)
Supplement: mmc4.pdf [file mmc4.pdf]

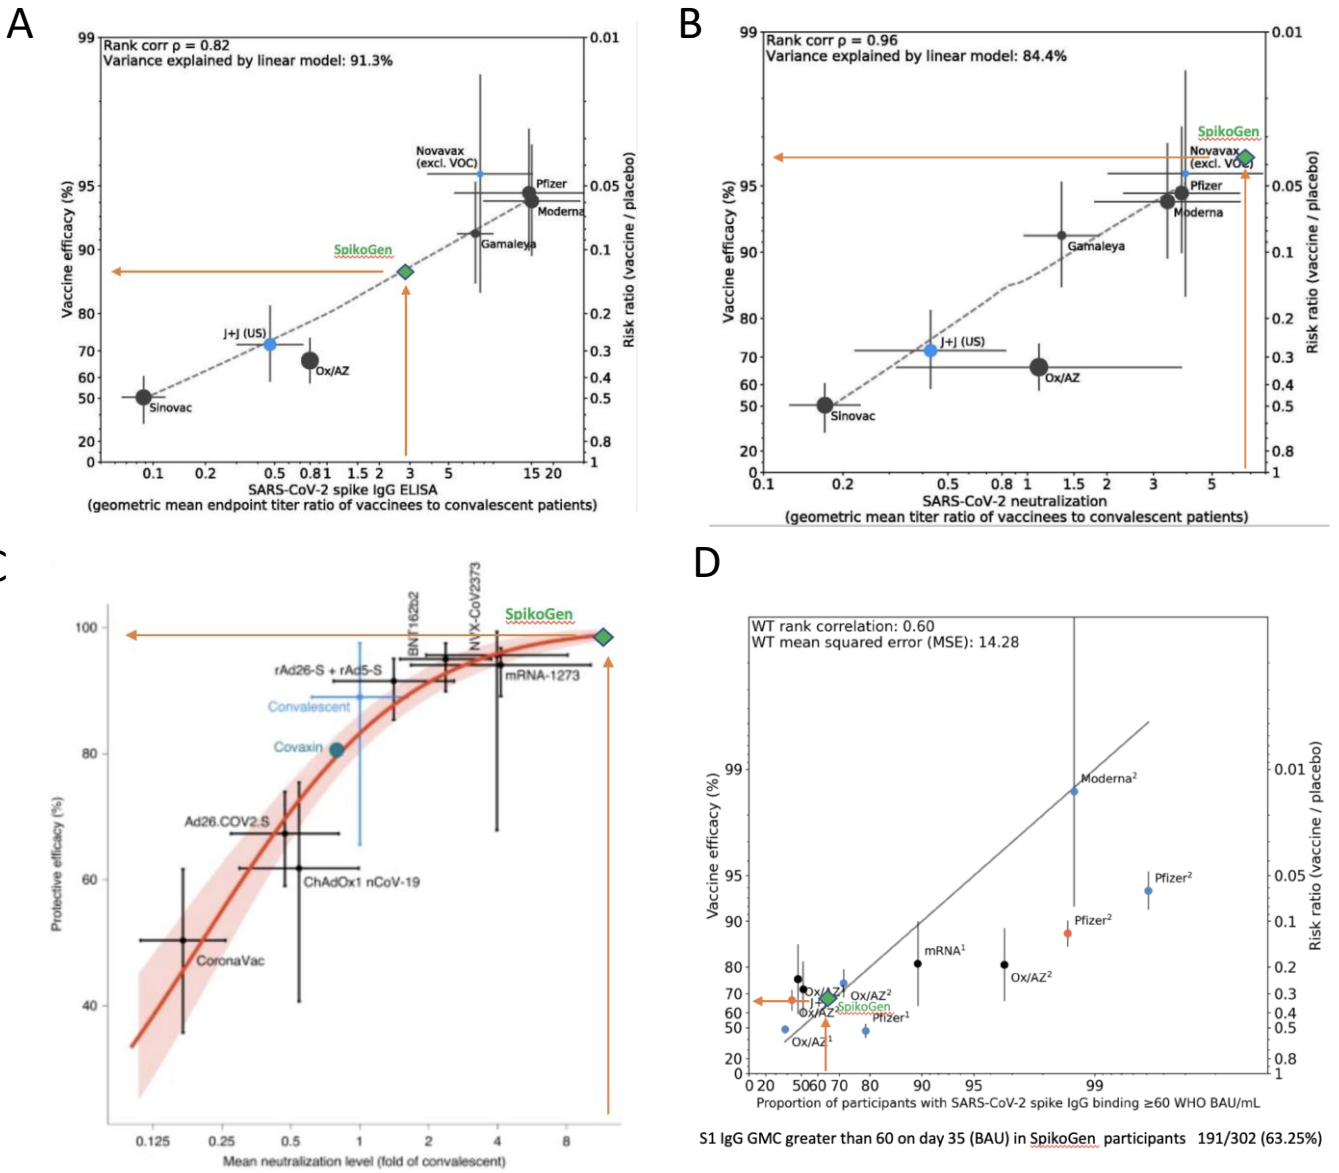

**Supplementary Figure 1.** Back extrapolation of vaccine efficacy against ancestral variants. Shown as a green diamond is the SpikoGen® results superimposed on each Figure with orange arrow indicating the predicted efficacy. GMC of  $S_1$ -binding IgG (A) or sVNT (B) of SpikoGen-immunized participants expressed as a ratio to baseline seropositive participants (convalescent sera) plotted onto graph from Earle et al figure2 or Khoury et al figure 1 (C). Proportion of participants with  $S_1$  IgG binding >60 WHO BAU/ml plotted onto the graph from Goldblatt et al figure S3 (D)
